# Supplementary material for: Digitalisation in Craft Enterprises: Perceived Technostress, Readiness for Prevention and Countermeasures—A Qualitative Study
Source: MDPI journal article supplement (doi:10.3390/ijerph191811349), 2022-09-09
Supplement: s1 [file s1]

| <b>Technostress creators</b>                |                                                                                                                                                                                                                        |
|---------------------------------------------|------------------------------------------------------------------------------------------------------------------------------------------------------------------------------------------------------------------------|
| <b>Techno-overload</b>                      | High work demands because of using digital technologies due to high work pace, frequent interruptions, multitasking, extended working hours, expectations of response times in digital communication, etc.             |
| <b>Techno-complexity</b>                    | Certain digital technologies are highly complex and challenge the user's concentration, qualification, feeling of control, which requires additional time in handling complexity                                       |
| <b>Techno-insecurity</b>                    | Fear of job loss or status deterioration due to the perception that digital technologies or more qualified personnel in terms of handling digital technologies will replace one's own job/position in whole or in part |
| <b>Techno-uncertainty</b>                   | A constant feeling of uncertainty and ambiguity caused by chronic digital transformation processes or by features of single digital technologies which foster constant change                                          |
| <b>Techno-invasion</b>                      | Mobile devices enable high flexibility, which can blur boundaries between work and other life domains, causing work-life-conflicts and impair work recovery                                                            |
| <b>Techno-unreliability</b>                 | Stress induced by breakdowns, technical errors, low usability, and poor user experience in certain digital technologies                                                                                                |
| <b>Stress in human-machine interaction</b>  | Irritation because of unpredictability of robot or machine behavior or unspecific anxiety towards robots, high complexity of such systems (see techno-complexity)                                                      |
| <b>Technological workplace surveillance</b> | New digital technologies can enable a close monitoring of work performance, location and working times, which can provoke distrust and loss of control in the monitored employees                                      |

This illustration is according to Ragu-Nathan et. al (2008); Dragano & Lunau (2020)
