# Supplementary material for: Digitalisation in Craft Enterprises: Perceived Technostress, Readiness for Prevention and Countermeasures—A Qualitative Study
Source: MDPI journal article supplement (doi:10.3390/ijerph191811349), 2022-09-09
Supplement: s1 [file s1]

## Additional file S3

### Consolidated criteria for reporting qualitative research (COREQ)

| No                                                                          | Item                                  | Description                                                                                                                                                                                                                                                                                                                                                                                                                                                   |
|-----------------------------------------------------------------------------|---------------------------------------|---------------------------------------------------------------------------------------------------------------------------------------------------------------------------------------------------------------------------------------------------------------------------------------------------------------------------------------------------------------------------------------------------------------------------------------------------------------|
| <b>Domain 1: Research team and reflexivity</b>                              |                                       |                                                                                                                                                                                                                                                                                                                                                                                                                                                               |
| <i>Personal characteristics</i>                                             |                                       |                                                                                                                                                                                                                                                                                                                                                                                                                                                               |
| 1.                                                                          | Interviewer                           | Louisa Scheepers [LS]                                                                                                                                                                                                                                                                                                                                                                                                                                         |
| 2.                                                                          | Credentials                           | Louisa Scheepers (M.Sc.), Prof. Dr. med. Peter Angerer [PA], Prof. Dr. Nico Dragano [ND]                                                                                                                                                                                                                                                                                                                                                                      |
| 3.                                                                          | Occupation                            | LS: research associate; PA and ND: university professor                                                                                                                                                                                                                                                                                                                                                                                                       |
| 4.                                                                          | Gender                                | LS: female; PA, ND: male                                                                                                                                                                                                                                                                                                                                                                                                                                      |
| 5.                                                                          | Experience and training               | LS: educational background in public health, practical experience in occupational health research<br>PA: educational background in occupational health and public health, practical experience in occupational health research, qualitative and quantitative research and teaching<br>ND: educational background in epidemiologic and public health, practical experience in occupational health research, qualitative and quantitative research and teaching |
| <i>Relationship with participants</i>                                       |                                       |                                                                                                                                                                                                                                                                                                                                                                                                                                                               |
| 6.                                                                          | Relationship established              | No                                                                                                                                                                                                                                                                                                                                                                                                                                                            |
| 7.                                                                          | Participant knowledge of interviewer  | Participants knew LS as a researcher and advertisement of the study                                                                                                                                                                                                                                                                                                                                                                                           |
| 8.                                                                          | Interviewer characteristics           | No other characteristics were reported about the interviewer                                                                                                                                                                                                                                                                                                                                                                                                  |
| <b>Domain 2: Study design</b>                                               |                                       |                                                                                                                                                                                                                                                                                                                                                                                                                                                               |
| <i>Theoretical framework</i>                                                |                                       |                                                                                                                                                                                                                                                                                                                                                                                                                                                               |
| 9.                                                                          | Methodological orientation and theory | Qualitative content analysis of Kuckartz (Kuckartz, 2016)                                                                                                                                                                                                                                                                                                                                                                                                     |
| <i>Participant selection</i>                                                |                                       |                                                                                                                                                                                                                                                                                                                                                                                                                                                               |
| Convenience and snowball sampling                                           |                                       |                                                                                                                                                                                                                                                                                                                                                                                                                                                               |
| 10.                                                                         | Sampling                              | Single Interviews                                                                                                                                                                                                                                                                                                                                                                                                                                             |
| 11.                                                                         | Method of approach                    | 26 participants                                                                                                                                                                                                                                                                                                                                                                                                                                               |
| 12.                                                                         | Sample size                           | Not applicable                                                                                                                                                                                                                                                                                                                                                                                                                                                |
| 13.                                                                         | Non-participation                     |                                                                                                                                                                                                                                                                                                                                                                                                                                                               |
| <i>Setting</i>                                                              |                                       |                                                                                                                                                                                                                                                                                                                                                                                                                                                               |
| 14.                                                                         | Setting of data collection            | Participants participated in interviews at the location of their workplace                                                                                                                                                                                                                                                                                                                                                                                    |
| 15.                                                                         | Presence of non-participants          | No                                                                                                                                                                                                                                                                                                                                                                                                                                                            |
| 16.                                                                         | Description of sample                 | Between 22 and 62 years (M=46), 23 males, 3 females                                                                                                                                                                                                                                                                                                                                                                                                           |
| <i>Data collection</i>                                                      |                                       |                                                                                                                                                                                                                                                                                                                                                                                                                                                               |
| Provided as supplemental material; Interview guide was piloted before study |                                       |                                                                                                                                                                                                                                                                                                                                                                                                                                                               |
| 17.                                                                         | Interview guide                       | None                                                                                                                                                                                                                                                                                                                                                                                                                                                          |
| 18.                                                                         | Repeat interviews                     | Audio recording                                                                                                                                                                                                                                                                                                                                                                                                                                               |
| 19.                                                                         | Audio/visual recording                | None                                                                                                                                                                                                                                                                                                                                                                                                                                                          |
| 20.                                                                         | Field notes                           | 38 – 92 minutes                                                                                                                                                                                                                                                                                                                                                                                                                                               |
| 21.                                                                         | Duration                              | Yes                                                                                                                                                                                                                                                                                                                                                                                                                                                           |
| 22.                                                                         | Data saturation                       | Yes                                                                                                                                                                                                                                                                                                                                                                                                                                                           |
| 23.                                                                         | Transcripts returned                  |                                                                                                                                                                                                                                                                                                                                                                                                                                                               |
| <b>Domain 3: Analysis and findings</b>                                      |                                       |                                                                                                                                                                                                                                                                                                                                                                                                                                                               |
| 24.                                                                         | Number of data coders                 | One (LS)                                                                                                                                                                                                                                                                                                                                                                                                                                                      |
| 25.                                                                         | Description of coding tree            | Provided as supplemental material; Examples of the Codebook                                                                                                                                                                                                                                                                                                                                                                                                   |
| 26.                                                                         | Derivation of themes                  | Deductive coding examples: work and health; digitalisation and work, digitalisation and health                                                                                                                                                                                                                                                                                                                                                                |
| 27.                                                                         | Software                              | MAXQDA 2020                                                                                                                                                                                                                                                                                                                                                                                                                                                   |
| 28.                                                                         | Participant checking                  | No                                                                                                                                                                                                                                                                                                                                                                                                                                                            |
| <i>Reporting</i>                                                            |                                       |                                                                                                                                                                                                                                                                                                                                                                                                                                                               |
| 29.                                                                         | Quotations presented                  | Yes                                                                                                                                                                                                                                                                                                                                                                                                                                                           |
| 30.                                                                         | Data and findings consistent          | Yes                                                                                                                                                                                                                                                                                                                                                                                                                                                           |
| 31.                                                                         | Clarity of major themes               | Yes                                                                                                                                                                                                                                                                                                                                                                                                                                                           |
| 32.                                                                         | Clarity of minor themes               | Yes                                                                                                                                                                                                                                                                                                                                                                                                                                                           |

Tong A, Sainsbury P, Craig J. Consolidated criteria for reporting qualitative research (COREQ): a 32-item checklist for interviews and focus groups. *International Journal for Quality in Health Care*. 2007;19(6):349-357.
